# Supplementary material
Source: PubMed Central journal article supplement (PMC4198427)
Supplement: NIHMS623497-supplement-10495_2014_1029_MOESM1_ESM.pdf [file NIHMS623497-supplement-10495_2014_1029_MOESM1_ESM.pdf]

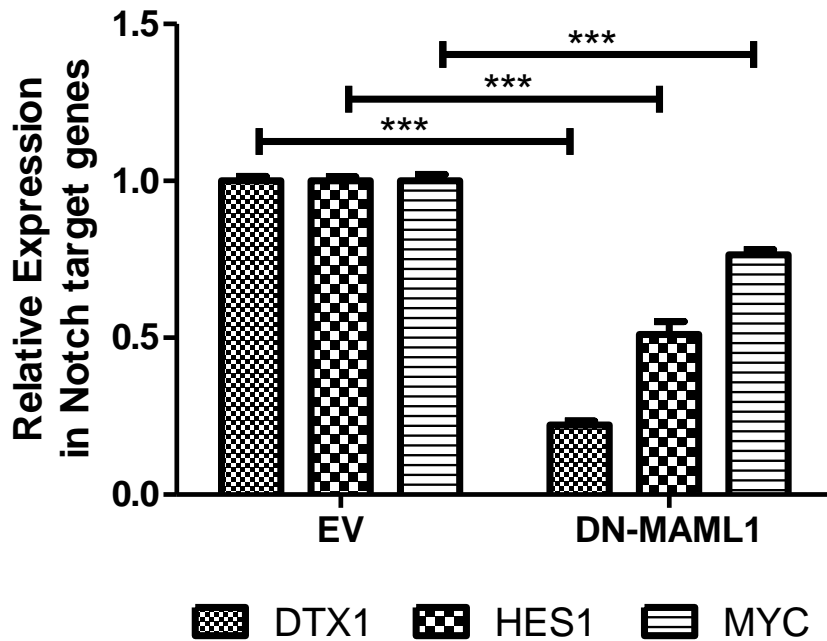

**Supplementary Figure S1. Dominant negative Mastermind-like 1 suppresses NOTCH1 target gene expression.** Quantitative RT-PCR analysis on the DTX1, HES1, and MYC mRNA levels in Jurkat cells transfected with dominant negative mastermind-like 1 (DN-MAML1) relative to those in Jurkat cells transfected with empty vector (EV). Results are presented as mean  $\pm$  SD of triplicate assays. The statistical significance of differences was determined by ANOVA test; \*,  $p < 0.05$ ; \*\*,  $p < 0.01$ ; \*\*\*,  $p < 0.001$ .

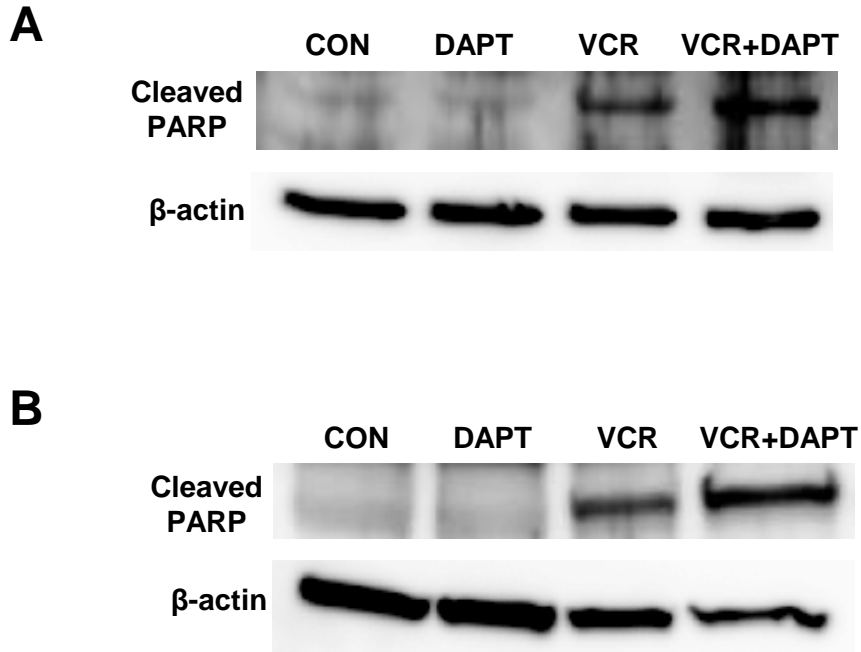

**Supplementary Figure S2. PARP cleavage induced by VCR is further increased by DAPT in T-ALL.** KOPT (A) and Jurkat (B) were treated with VCR (2 nM) and/or DAPT (10  $\mu$ M) or left untreated for 24 h and 48 h, respectively. Cell lysates were analyzed for cleaved form of PARP by Western blot. Beta-actin served as a loading control.
